# Supplementary material for: Social cognition deficits and biometric signatures in the behavioural variant of Alzheimer’s disease
Source: PubMed Central journal article supplement — Brain. 2022 Oct 21;146(5):2163–74. doi: 10.1093/brain/awac382 (PMC10151185; doi:10.1093/brain/awac382), 2022-10-21
Supplement: awac382_supplementary_data.pdf [file awac382_supplementary_data.pdf]

## SUPPLEMENTARY MATERIAL

**Supplementary Table 1. Characteristics of the SCD group**

|                                        | SCD               |
|----------------------------------------|-------------------|
| n                                      | 13                |
| Amyloid negativity, count (percentage) | 10/13 (76.9%)*    |
| GDS score, 0-15, mean (SD)             | 1.58 (1.68)       |
| NPI score, 0-144, mean (SD)            | 2.43 (4.16)       |
| Fazekas score, 0-3, median [IQ range]  | 0.00 [0.00, 1.00] |
| MTA score, 0-3, median [IQ range]      | 0.00 [0.00, 1.00] |
| GCA score, 0-3, median [IQ range]      | 0.00 [0.00, 1.00] |

\*In the 3 other cases amyloid status was unknown

**Supplementary Table 2. Cognition domain z-scores across diagnostic groups**

|                    | bvAD         | tAD          | bvFTD        | SCD          | p-value | Group-differences, uncorrected                            | Group differences, age and sex adjusted                   |
|--------------------|--------------|--------------|--------------|--------------|---------|-----------------------------------------------------------|-----------------------------------------------------------|
| n                  | 11           | 13           | 12           | 13           |         |                                                           |                                                           |
| Attention, z-score | -1.04 (1.12) | -0.94 (1.30) | -0.67 (0.84) | 0.17 (0.60)  | 0.08    | bvAD<SCD, p=0.003, tAD<SCD, p=0.004, bvFTD<SCD, p=0.04    | bvAD<SCD, p=0.05, tAD<SCD, p=0.04                         |
| Language, z-score  | -1.22 (1.85) | -0.59 (0.44) | -1.50 (1.23) | 0.05 (0.52)  | 0.14    | bvAD<SCD, p=0.005, bvFTD<SCD, p=0.001, bvFTD<tAD, p=0.05  | bvAD<SCD, p=0.002, bvFTD<SCD, p=0.0003, bvFTD<tAD, p=0.04 |
| Memory, z-score    | -2.34 (1.55) | -3.38 (2.60) | -1.36 (0.77) | -0.14 (0.73) | 0.08    | bvAD<SCD, p=0.0009, tAD<SCD, p<0.0001, tAD<bvFTD, p=0.001 | bvAD<SCD, p=0.009, tAD<SCD, p<0.0001, tAD<bvFTD, p=0.003  |
| Executive, z-score | -1.49 (1.36) | -0.77 (1.16) | -1.11 (0.73) | 0.19 (0.60)  | 0.11    | bvAD<SCD, p=0.0001, tAD<SCD, p=0.02, bvFTD<SCD, p=0.005   | bvAD<SCD, p=0.002, bvFTD<SCD, p=0.03                      |

Mean (SD) are depicted.

**Supplementary Table 3.** Details on the galvanic skin response methodology used in the iMotions R notebook to extract peaks per minute

---

- 1 The calibrated GSR signal from the sensor (Shimmer or BIOPAC EDA100C) is retrieved for the given stimulus and respondent (expressed in microSiemens,  $\mu\text{S}$ ).
  - 2 The sample rate is determined. Parameter [Gap interpolation length threshold [ms]] is used to identify possible gaps in the signal due to signal drops. If a gap in the signal is shorter than this threshold, then the missing data is linearly interpolated. Otherwise, the gap is left and each of the signal fragments is processed separately. Option [Remove signal discontinuities caused by the sensor switching range setting] should only be checked when the recorded signal has many discontinuities caused by the auto-range switching setting of Shimmer.
  - 3 The phasic signal is extracted using a median filter over a fixed length time window: parameter [Phasic filter length [ms]]. The phasic signal is calculated by subtracting the running median from the calibrated signal, smoothing the ends of the signal by using symmetrical medians of subsequently smaller bandwidth, but for the very first and last value where Tukey's robust end-point rule is applied.
  - 4 A low-pass Butterworth filter with cutoff frequency: parameter [Lowpass filter cutoff frequency [Hz]] is applied to the phasic signal (in order to remove powerline noise).
  - 5 Onsets and offsets are detected on the phasic signal. Onsets are all the points where the phasic signal crosses above the onset threshold: parameter [Peak onset threshold [microSiemens]]. Offsets are the points where the phasic signal crosses below the offset threshold: parameter [Peak offset threshold [microSiemens]]. Each onset-offset pair defines a window, and the maximum value attained by the calibrated signal in a window is marked as a possible peak. The amplitude of a possible peak is defined as the difference between the maximum value of the calibrated signal in the window and its value at the onset point. A possible peak is selected if:
    - (1) Its amplitude is above the amplitude threshold: parameter [Peak amplitude threshold [microSiemens]], and
    - (2) the time difference between onset and offset is above the duration threshold: parameter [Minimum peak duration [ms]].The selected peaks are returned.
-

## Emotion Recognition

**Supplementary Table 4.** Ekman test scores across groups

|          | bvAD         | tAD          | bvFTD        | SCD          | p-value* | Group differences, unadjusted                                                                                   | Group differences, adjusted**                                                                                  |
|----------|--------------|--------------|--------------|--------------|----------|-----------------------------------------------------------------------------------------------------------------|----------------------------------------------------------------------------------------------------------------|
| Nekman   | 12           | 13           | 14           | 13           |          |                                                                                                                 |                                                                                                                |
| Happy    | 9.50 (1.00)  | 9.62 (0.96)  | 9.43 (0.85)  | 10.00 (0.00) | 0.07     | ns                                                                                                              | ns                                                                                                             |
| Angry    | 6.17 (2.41)  | 8.38 (1.33)  | 4.79 (3.14)  | 8.75 (1.54)  | 0.0007   | bvAD<SCD, p=0.005,<br>bvFTD<SCD, p<0.00001,<br>bvAD<tAD, p=0.01,<br>bvFTD<tAD, p<0.00001                        | bvAD<SCD, p=0.02,<br>bvFTD<SCD, p<0.0001,<br>SCD,<br>bvAD<tAD, p=0.02<br>bvFTD<tAD, p<0.0001                   |
| Disgust  | 5.42 (2.54)  | 6.85 (1.68)  | 3.71 (2.61)  | 8.25 (1.60)  | <0.00001 | bvAD<SCD, p=0.001,<br>bvFTD<SCD, p<0.00001,<br>bvFTD<bvAD, p=0.05,<br>bvFTD<tAD, p=0.0002                       | bvAD<SCD, p=0.001,<br>tAD<SCD, p=0.05,<br>bvFTD<SCD, p<0.00001,<br>bvAD>bvFTD, p=0.03                          |
| Fear     | 5.08 (2.78)  | 6.15 (1.99)  | 3.50 (2.35)  | 6.67 (2.19)  | 0.005    | bvFTD<SCD, p=0.0006,<br>bvFTD<tAD, p=0.003                                                                      | bvFTD<SCD, p=0.004, ,<br>bvFTD<tAD, p=0.01                                                                     |
| Sad      | 5.83 (2.59)  | 6.38 (2.26)  | 3.71 (2.46)  | 7.00 (2.00)  | 0.0005   | bvFTD<SCD, p=0.0004,<br>bvFTD<bvAD, p=0.02,<br>bvFTD<tAD, p=0.003                                               | bvFTD<SCD, p=0.001,<br>bvFTD<bvAD, p=0.01,<br>bvFTD<tAD, p=0.01                                                |
| Surprise | 8.08 (1.68)  | 8.85 (1.28)  | 7.29 (1.86)  | 9.00 (0.74)  | 0.002    | bvFTD<SCD, p=0.003,<br>bvFTD<tAD, p=0.006                                                                       | bvAD<SCD, p=0.05,<br>bvFTD<SCD, p=0.001,<br>bvFTD<tAD, p=0.002                                                 |
| Total    | 40.08 (8.63) | 46.23 (5.31) | 32.43 (7.26) | 49.67 (5.02) | <0.00001 | bvAD<SCD, p=0.0005,<br>bvFTD<SCD, p<0.0001,<br>bvAD<tAD, p=0.02,<br>bvFTD<bvAD, p=0.004,<br>bvFTD<tAD, p<0.0001 | bvAD<SCD, p=0.003,<br>bvFTD<SCD, p<0.0001,<br>bvAD<tAD, p=0.05,<br>bvAD>bvFTD, p=0.003,<br>tAD>bvFTD, p<0.0001 |

\*based on anova test

\*\*based on post hoc group comparisons

\*\*\*based on post hoc group comparisons adjusted for age and sex

**Supplementary Table 5.** Dwell time within Areas of Interest (AOI) Eyes in Ekman faces across groups

|                  | bvAD          | tAD           | bvFTD         | SCD            | p-value* | Group differences,<br>unadjusted | Group differences,<br>adjusted ** |
|------------------|---------------|---------------|---------------|----------------|----------|----------------------------------|-----------------------------------|
| N <sub>AOI</sub> | 12            | 13            | 12            | 13             |          |                                  |                                   |
| Happy            | 30.99 (13.58) | 27.27 (13.58) | 27.27 (17.15) | 28.53 (12.57)  | ns       | ns                               | ns                                |
| Angry            | 43.74 (17.42) | 34.45 (16.03) | 32.50 (26.08) | 38.97 (16.11)  | ns       | ns                               | ns                                |
| Disgust          | 44.59 (17.62) | 33.37 (19.74) | 31.08 (25.79) | 38.45 (15.53)  | ns       | ns                               | ns                                |
| Fear             | 45.12 (17.68) | 45.12 (16.82) | 33.34 (26.26) | 40.69 (17.06)  | ns       | ns                               | ns                                |
| Sad              | 50.21 (17.62) | 38.11 (18.58) | 35.09 (24.62) | 43.10 (15.12)  | ns       | ns                               | ns                                |
| Surprise         | 43.59 (18.85) | 31.09 (15.84) | 30.72 (26.42) | 36.20 (16.12 ) | ns       | ns                               | ns                                |
| Total            | 43.06 (15.65) | 32.95 (16.58) | 30.86 (24.94) | 37.66 (14.44 ) | ns       | ns                               | ns                                |

\*based on ANOVA test

\*\*based on post hoc group comparisons

\*\*\* based on post hoc group comparisons adjusted for age and sex

**Supplementary Table 6.** Dwell time within Areas of Interest (AOI) Mouth in Ekman faces across groups

|                  | bvAD          | tAD           | bvFTD         | SCD           | p-value* | Group differences, unadjusted**                                              | Group differences, adjusted **                                               |
|------------------|---------------|---------------|---------------|---------------|----------|------------------------------------------------------------------------------|------------------------------------------------------------------------------|
| N <sub>AOI</sub> | 12            | 13            | 12            | 13            |          |                                                                              |                                                                              |
| Happy            | 21.10 (12.43) | 34.47 (13.19) | 20.40 (14.46) | 35.24 (8.27)  | ns       | bvAD<SCD, p=0.004, bvFTD<SCD, p=0.003, bvAD<tAD, p=0.006, bvFTD<tAD, p=0.004 | bvAD<SCD, p=0.01, bvFTD<SCD, p=0.008, bvAD<tAD, p=0.006, bvFTD<tAD, p=0.003  |
| Angry            | 18.55 (9.27)  | 33.17 (11.17) | 19.60 (15.86) | 31.67 (13.00) | ns       | bvAD<SCD, p=0.0009, bvFTD<SCD, p=0.02, bvAD<tAD, p=0.004, bvFTD<tAD, p=0.007 | bvAD<SCD, p=0.008, bvFTD<SCD, p=0.02, bvAD<tAD, p=0.002, bvFTD<tAD, p=0.005  |
| Disgust          | 19.69 (10.02) | 33.93 (13.42) | 20.18 (15.04) | 31.78 (14.31) | ns       | bvAD<SCD, p=0.02, bvFTD<SCD, p=0.03, bvAD<tAD, p=0.008, bvAD<bvFTD, p=0.01   | bvAD<SCD, p=0.02, bvFTD<SCD, p=0.04, bvAD<tAD, p=0.002, bvFTD<tAD, p=0.004   |
| Fear             | 19.30 (9.82)  | 32.67 (12.84) | 18.89 (13.75) | 30.43 (12.20) | ns       | bvAD<SCD, p=0.02, bvFTD<SCD, p=0.02, bvAD<tAD, p=0.006, bvFTD<tAD, p=0.005   | bvAD<SCD, p=0.02, bvFTD<SCD, p=0.02, bvAD<tAD, p=0.002, bvFTD<tAD, p=0.003   |
| Sad              | 15.29 (8.44)  | 30.27 (12.08) | 17.78 (15.52) | 27.23 (13.60) | ns       | bvAD<SCD, p=0.02, bvAD<tAD, p=0.003, bvFTD<tAD, p=0.01                       | bvAD<SCD, p=0.005, bvFTD<SCD, p=0.03, bvAD<tAD, p=0.0006, bvFTD<tAD, p=0.005 |
| Surprise         | 18.49 (10.46) | 31.81 (12.58) | 19.33 (13.56) | 27.93 (11.64) | ns       | bvAD<SCD, p=0.04, bvAD<tAD, p=0.006, bvFTD<tAD, p=0.01                       | bvAD<SCD, p=0.04, bvAD<tAD, p=0.004, bvFTD<tAD, p=0.007                      |
| Total            | 18.74 (9.53)  | 32.72 (12.08) | 19.37 (14.28) | 30.71 (11.58) | ns       | bvAD<SCD, p=0.01, bvFTD<SCD, p=0.02, bvAD<tAD, p=0.004, bvFTD<tAD, p=0.005   | bvAD<SCD, p=0.01, bvFTD<SCD, p=0.02, bvAD<tAD, p=0.001, bvFTD<tAD, p=0.003   |

\*based on ANOVA test

\*\*based on post hoc group comparisons

\*\*\* based on post hoc group comparisons adjusted for age and sex

## Empathy - Interpersonal Reactivity Index

**Supplementary Table 7.** Scores on the Interpersonal Reactivity Index, a questionnaire measuring empathy, across diagnostic groups

|                    | bvAD         | tAD          | bvFTD        | SCD          | p-value* | Group differences, unadjusted                             | Group differences, age and sex adjusted**                |
|--------------------|--------------|--------------|--------------|--------------|----------|-----------------------------------------------------------|----------------------------------------------------------|
| n                  | 9            | 10           | 11           | 13           |          |                                                           |                                                          |
| Perspective Taking | 11.33 (4.58) | 13.00 (3.19) | 8.73 (5.61)  | 15.62 (3.07) | 0.0001   | bvAD<SCD, p=0.02, bvFTD<SCD, p=0.0001, bvFTD<tAD, p=0.02  | bvAD<SCD, p=0.05, bvFTD<SCD, p=0.0007, bvFTD<tAD, p=0.03 |
| Empathetic Concern | 12.89 (4.28) | 12.40 (4.19) | 12.00 (3.00) | 13.77 (1.24) | 0.23     | ns                                                        | ns                                                       |
| Fantasy            | 10.33 (5.22) | 13.00 (3.09) | 8.64 (3.96)  | 13.62 (1.89) | 0.0005   | bvAD<SCD, p=0.04, bvFTD<SCD, p=0.0007, bvFTD<tAD, p=0.005 | bvFTD<SCD, p=0.01, bvFTD<tAD, p=0.02                     |
| Personal Distress  | 13.11 (3.52) | 14.50 (2.95) | 14.45 (3.01) | 14.69 (1.93) | 0.59     | ns                                                        | ns                                                       |

\*based on ANOVA test

\*\*based on post hoc group comparisons

\*\*\* based on post hoc group comparisons adjusted for age and sex



## Empathy – empathy eliciting videos

**Supplementary Table 8.** Results of empathy videos across diagnostic groups: empathetic concern and personal distress scores and galvanic skin response while watching empathy eliciting videos

|                           | bvAD        | tAD         | bvFTD       | SCD         | p-value* | Group differences, unadjusted | Group differences, age and sex adjusted** |
|---------------------------|-------------|-------------|-------------|-------------|----------|-------------------------------|-------------------------------------------|
| n                         | 11          | 11          | 11          | 12          |          |                               |                                           |
| Empathetic concern        | 2.55 (1.08) | 2.61 (1.21) | 2.11 (1.20) | 2.74 (0.73) | 0.17     | ns                            | ns                                        |
| Personal distress         | 1.61 (0.66) | 1.64 (0.66) | 1.87 (1.20) | 1.56 (0.55) | 0.42     | ns                            | ns                                        |
| n                         | 11          | 11          | 10          | 12          |          |                               |                                           |
| GSR PPM uplifting video   | 1.56 (1.99) | 1.56 (1.99) | 2.31 (2.66) | 2.11 (1.85) | 0.08     | ns                            | ns                                        |
| GSR PPM distressing video | 1.97 (2.41) | 1.97 (2.41) | 2.06 (3.10) | 1.73 (1.88) | 0.38     | ns                            | ns                                        |

\*based on ANOVA test

\*\*based on post hoc group comparisons

\*\*\* based on post hoc group comparisons adjusted for age and sex

**Supplementary Table 9.** Mean GSR per baseline condition and empathy video condition across groups.

|                                             | bvAD (N=10)    | tAD (N=11)    | bvFTD (N=11)  | SCD (N=13)    | p-value | Group differences adjusted | Group differences, age and sex adjusted |
|---------------------------------------------|----------------|---------------|---------------|---------------|---------|----------------------------|-----------------------------------------|
| GSR Nature videos, mean (SD)                | 1.48 (1.45)    | 1.58 (1.26)   | 0.762 (0.547) | 1.31 (0.781)  | 0.40    | ns                         | tAD>bvFTD, p=0.05                       |
| GSR Empathy videos, Mean (SD)               | 1.51 (0.998)   | 1.49 (1.26)   | 0.995 (0.736) | 1.92 (1.68)   | 0.16    | ns                         | ns                                      |
| Δ GSR Empathy-Nature videos, Mean (SD)      | 0.0305 (0.721) | 0.142 (0.320) | 0.178 (0.311) | 0.271 (0.532) | 0.67    | ns                         | ns                                      |
| P-value difference Empathy vs Nature videos | 0.55           | 0.90          | 0.91          | 0.96          | -       | -                          | -                                       |

## Knowledge of Social Norms

**Supplementary Table 10.** Scores on Social Norms Questionnaire across diagnostic groups

|                         | bvAD         | tAD          | bvFTD        | SCD          | p-value* | Group differences, unadjusted**                                              | Group differences, sex and age adjusted***                                  |
|-------------------------|--------------|--------------|--------------|--------------|----------|------------------------------------------------------------------------------|-----------------------------------------------------------------------------|
| n                       | 11           | 11           | 11           | 13           |          |                                                                              |                                                                             |
| SNQ total score         | 16.00 (1.61) | 17.82 (2.14) | 15.18 (2.23) | 18.33 (1.37) | 0.00003  | bvAD<SCD, p=0.003, bvFTD<SCD, p<0.0001, bvAD<tAD, p=0.02, bvFTD<tAD, p=0.009 | bvAD<SCD, p=0.01, bvFTD<SCD, p=0.0003, bvAD<tAD, p=0.05, bvFTD<tAD, p=0.002 |
| SNQ break score         | 2.09 (1.51)  | 1.09 (0.54)  | 1.73 (1.42)  | 1.08 (0.51)  | 0.05     | bvAD<SCD, p=0.05                                                             | bvAD<SCD, p=0.05                                                            |
| SNQ overadherence score | 3.91 (1.58)  | 3.09 (2.12)  | 5.09 (2.30)  | 2.58 (1.08)  | 0.001    | bvFTD<SCD, p=0.001, bvFTD<tAD, p=0.01                                        | bvFTD<SCD, p=0.004, bvFTD<tAD, p=0.02                                       |

\*based on ANOVA test

\*\*based on post hoc group comparisons

\*\*\* based on post hoc group comparisons adjusted for age and sex

## Moral reasoning

**Supplementary Table 11.** Scores on and galvanic skin response to moral dilemmas, across diagnostic groups

|                                                   | bvAD        | tAD         | bvFTD       | SCD         | p-value* | Group differences, unadjusted | Group differences, age and sex adjusted** |
|---------------------------------------------------|-------------|-------------|-------------|-------------|----------|-------------------------------|-------------------------------------------|
| n                                                 | 10          | 11          | 11          | 12          |          |                               |                                           |
| Personal dilemma, percentage rational responses   | 50.00       | 36.36       | 18.18       | 16.67       | 0.       | ns                            | ns                                        |
| Impersonal dilemma, percentage rational responses | 90.00       | 90.91       | 81.82       | 92.30       | 0.       | ns                            | ns                                        |
| n                                                 | 10          | 11          | 9           | 10          |          |                               |                                           |
| Impersonal dilemma, GSR PPM                       | 3.17 (2.34) | 3.16 (3.65) | 1.48 (1.71) | 2.66 (2.11) | 0.38     | ns                            | ns                                        |
| Personal dilemma, GSR PPM                         | 2.89 (2.29) | 3.43 (4.07) | 0.86 (1.08) | 3.44 (3.33) | 0.06     | ns                            | bvFTD<SCD, p=0.01                         |

\*based on ANOVA test

\*\*based on post hoc group comparisons

\*\*\* based on post hoc group comparisons adjusted for age and sex

**Supplementary Tables – sensitivity analyses without the three unknown amyloid status cases in the SCD group.**

**Supplementary Table 12.** Characteristics of the SCD group

|                                        | SCD               |
|----------------------------------------|-------------------|
| n                                      | 10                |
| Amyloid negativity, count (percentage) | 10/10 (100%)*     |
| GDS score, 0-15, mean (SD)             | 2.20 (2.04)       |
| NPI score, 0-144, mean (SD)            | 8.10 (16.72)      |
| Fazekas score, 0-3, median [IQ range]  | 0.00 [0.00, 1.00] |
| MTA score, 0-3, median [IQ range]      | 0.00 [0.00, 1.00] |
| GCA score, 0-3, median [IQ range]      | 0.00 [0.00, 1.00] |

**Supplementary Table 13. Demographic characteristics across diagnostic groups**

|                                  | bvAD         | tAD          | bvFTD        | SCD          | p-value                                      |
|----------------------------------|--------------|--------------|--------------|--------------|----------------------------------------------|
| N                                | 12           | 12           | 14           | 10           |                                              |
| Age                              | 66.6 (5.7)   | 64.6 (6.7)   | 66.4 (7.0)   | 58.0 (5.1)   | 0.07                                         |
| Sex, % men                       | 75           | 38.5         | 64.3         | 40.0         | 0.24**                                       |
| MMSE                             | 24.8 (2.5)   | 24.7 (4.6)   | 26.2 (2.3)   | 28.0 (1.6)   | <b>0.03*</b>                                 |
| Education<br>(Verhage score 1-7) | 5.1 (1.4)    | 5.8 (1.3)    | 5.4 (0.9)    | 5.6 (0.7)    | <b>0.02*</b>                                 |
| APOEε4 (% carrier)               | 6/10 (60.0)  | 10/12 (83.3) | 1/6 (17.0)   | 5/10 (50)    | <b>0.05*</b>                                 |
| Attention domain z-score         | -1.04 (1.12) | -0.94 (1.30) | -0.67 (0.84) | 0.06 (0.55)  | ns                                           |
| Language domain z-score          | -1.22 (1.85) | -0.59 (0.44) | -1.50 (1.23) | 0.06 (0.46)  | bvAD<SCD, p=0.004,<br>bvFTD<SCD,<br>p=0.0008 |
| Memory domain z-score            | -2.34 (1.55) | -3.38 (2.60) | -1.36 (0.77) | -0.15 (0.62) | bvAD<SCD, p=0.02,<br>tAD<SCD, p=0.0001       |
| Executive domain z-score         | -1.49 (1.36) | -0.77 (1.16) | -1.11 (0.73) | 0.15 (0.51)  | bvAD<SCD, p=0.006                            |

Mean (SD) are reported unless stated otherwise. Domain z-scores were calculated in reference to a cognitively normal amyloid-negative control group (n=583)<sup>23</sup>. Cognition p-values are age and sex adjusted.

**Supplementary Table 14.** Cognition domain z-scores across diagnostic groups

|                    | bvAD         | tAD          | bvFTD        | SCD          | p-value | Group-differences, uncorrected                           | Group differences, age and sex adjusted |
|--------------------|--------------|--------------|--------------|--------------|---------|----------------------------------------------------------|-----------------------------------------|
| n                  | 11           | 13           | 12           | 10           |         |                                                          |                                         |
| Attention, z-score | -1.04 (1.12) | -0.94 (1.30) | -0.67 (0.84) | 0.06 (0.55)  | 0.04    | bvAD<SCD, p=0.01, tAD<SCD, p=0.02                        | ns                                      |
| Language, z-score  | -1.22 (1.85) | -0.59 (0.44) | -1.50 (1.23) | 0.06 (0.46)  | 0.11    | bvAD<SCD, p=0.01, bvFTD<SCD, p=0.002                     | bvAD<SCD, p=0.004, bvFTD<SCD, p=0.0008  |
| Memory, z-score    | -2.34 (1.55) | -3.38 (2.60) | -1.36 (0.77) | -0.15 (0.62) | 0.06    | bvAD<SCD, p=0.002, tAD<SCD, p<0.0001, tAD<bvFTD, p=0.002 | bvAD<SCD, p=0.02, tAD<SCD, p=0.0001     |
| Executive, z-score | -1.49 (1.36) | -0.77 (1.16) | -1.11 (0.73) | 0.15 (0.51)  | 0.08    | bvAD<SCD, p=0.0003, tAD<SCD, p=0.03, bvFTD<SCD, p=0.01   | bvAD<SCD, p=0.006                       |

Mean (SD) are depicted.

## Emotion Recognition

**Supplementary Table 15.** Ekman test scores across groups

|                    | bvAD        | tAD         | bvFTD       | SCD          | p-value* | Group differences, unadjusted**                                                           | Group differences, adjusted***                                                            |
|--------------------|-------------|-------------|-------------|--------------|----------|-------------------------------------------------------------------------------------------|-------------------------------------------------------------------------------------------|
| N <sub>Ekman</sub> | 12          | 13          | 14          | 10           |          |                                                                                           |                                                                                           |
| Happy              | 9.50 (1.00) | 9.62 (0.96) | 9.43 (0.85) | 10.00 (0.00) | 0.11     | ns                                                                                        | ns                                                                                        |
| Angry              | 6.17 (2.41) | 8.38 (1.33) | 4.79 (3.14) | 8.67 (1.80)  | 0.00002  | bvAD<SCD, p=0.02,<br>bvFTD<SCD, p=0.0001,<br>bvAD<tAD, p=0.02,<br>bvFTD<tAD, p=0.0001     | bvAD<SCD, p=0.02,<br>bvFTD<SCD, p<0.0001, SCD,<br>bvAD<tAD, p=0.02<br>bvFTD<tAD, p=0.0003 |
| Disgust            | 5.42 (2.54) | 6.85 (1.68) | 3.71 (2.61) | 8.55 (1.42)  | <0.00001 | bvAD<SCD, p=0.001,<br>bvFTD<SCD, p<0.00001,<br>bvFTD<bvAD, p=0.05,<br>bvFTD<tAD, p=0.0002 | bvAD<SCD, p=0.0008,<br>tAD<SCD, p=0.03,<br>bvFTD<SCD, p<0.00001,<br>bvAD>bvFTD, p=0.04    |
| Fear               | 5.08 (2.78) | 6.15 (1.99) | 3.50 (2.35) | 6.22 (2.33)  | 0.003    | bvFTD<SCD, p=0.007,<br>bvFTD<tAD, p=0.004                                                 | bvFTD<SCD, p=0.02,<br>bvFTD<tAD, p=0.01                                                   |
| Sad                | 5.83 (2.59) | 6.38 (2.26) | 3.71 (2.46) | 7.00 (1.58)  | 0.0007   | bvFTD<SCD, p=0.0008,<br>bvFTD<bvAD, p=0.02,<br>bvFTD<tAD, p=0.003                         | bvFTD<SCD, p=0.002,<br>bvFTD<tAD, p=0.003                                                 |
| Surprise           | 8.08 (1.68) | 8.85 (1.28) | 7.29 (1.86) | 9.11 (0.78)  | 0.002    | bvFTD<SCD, p=0.005,<br>bvFTD<tAD, p=0.007                                                 | bvFTD<SCD, p=0.002,<br>bvFTD<tAD, p=0.003                                                 |

|       |              |              |              |              |          |                                                                                                                |                                                                                           |
|-------|--------------|--------------|--------------|--------------|----------|----------------------------------------------------------------------------------------------------------------|-------------------------------------------------------------------------------------------|
| Total | 40.08 (8.63) | 46.23 (5.31) | 32.43 (7.26) | 49.55 (5.03) | <0.00001 | bvAD<SCD, p=0.002,<br>bvFTD<SCD, p<0.0001,<br>bvAD<tAD, p=0.02,<br>bvFTD<bvAD, p=0.004,<br>bvFTD<tAD, p<0.0001 | bvAD<SCD, p=0.006,<br>bvFTD<SCD, p<0.0001,<br>bvAD>bvFTD, p=0.004,<br>tAD>bvFTD, p<0.0001 |
|-------|--------------|--------------|--------------|--------------|----------|----------------------------------------------------------------------------------------------------------------|-------------------------------------------------------------------------------------------|

---

\*based on anova test

\*\*based on post hoc group comparisons

\*\*\*based on post hoc group comparisons adjusted for age and sex



**Supplementary Table 16.** Dwell time within Areas of Interest (AOI) Eyes in Ekman faces across groups

|                  | bvAD          | tAD           | bvFTD         | SCD            | p-value* | Group differences, unadjusted** | Group differences, adjusted *** |
|------------------|---------------|---------------|---------------|----------------|----------|---------------------------------|---------------------------------|
| N <sub>AOI</sub> | 12            | 13            | 12            | 10             |          |                                 |                                 |
| Happy            | 30.99 (13.58) | 27.27 (13.58) | 27.27 (17.15) | 28.71 (14.17)  | 0.50     | ns                              | ns                              |
| Angry            | 43.74 (17.42) | 34.45 (16.03) | 32.50 (26.08) | 39.69 (17.46)  | 0.65     | ns                              | ns                              |
| Disgust          | 44.59 (17.62) | 33.37 (19.74) | 31.08 (25.79) | 39.01 (17.34)  | 0.66     | ns                              | ns                              |
| Fear             | 45.12 (17.68) | 45.12 (16.82) | 33.34 (26.26) | 41.96 (19.37)  | 0.64     | ns                              | ns                              |
| Sad              | 50.21 (17.62) | 38.11 (18.58) | 35.09 (24.62) | 44.40 (16.54)  | 0.57     | ns                              | ns                              |
| Surprise         | 43.59 (18.85) | 31.09 (15.84) | 30.72 (26.42) | 38.86 (17.58)  | 0.69     | ns                              | ns                              |
| Total            | 43.06 (15.65) | 32.95 (16.58) | 30.86 (24.94) | 38.77 (16.21 ) | 0.60     | ns                              | ns                              |

\*based on ANOVA test

\*\*based on post hoc group comparisons

\*\*\* based on post hoc group comparisons adjusted for age and sex

**Supplementary Table 17.** Dwell time within Areas of Interest (AOI) Mouth in Ekman faces across groups

|                  | bvAD          | tAD           | bvFTD         | SCD           | p- value | Group differences, unadjusted**                                              | Group differences, adjusted **                                             |
|------------------|---------------|---------------|---------------|---------------|----------|------------------------------------------------------------------------------|----------------------------------------------------------------------------|
| N <sub>AOI</sub> | 12            | 13            | 12            | 10            |          |                                                                              |                                                                            |
| Happy            | 21.10 (12.43) | 34.47 (13.19) | 20.40 (14.46) | 34.15 (7.70)  | 0.002    | bvAD<SCD, p=0.01, bvFTD<SCD, p=0.01, bvAD<tAD, p=0.007, bvFTD<tAD, p=0.005   | bvAD<SCD, p=0.04, bvFTD<SCD, p=0.03, bvAD<tAD, p=0.009, bvFTD<tAD, p=0.005 |
| Angry            | 18.55 (9.27)  | 33.17 (11.17) | 19.60 (15.86) | 32.42 (12.67) | 0.003    | bvAD<SCD, p=0.0009, bvFTD<SCD, p=0.02, bvAD<tAD, p=0.003, bvFTD<tAD, p=0.006 | bvAD<SCD, p=0.01, bvFTD<SCD, p=0.02, bvAD<tAD, p=0.003, bvFTD<tAD, p=0.006 |
| Disgust          | 19.69 (10.02) | 33.93 (13.42) | 20.18 (15.04) | 32.10 (14.24) | 0.005    | bvAD<SCD, p=0.03, bvFTD<SCD, p=0.03, bvAD<tAD, p=0.007, tAD<bvFTD, p=0.01    | bvAD<SCD, p=0.03, bvFTD<SCD, p=0.05, bvAD<tAD, p=0.003, bvFTD<tAD, p=0.005 |
| Fear             | 19.30 (9.82)  | 32.67 (12.84) | 18.89 (13.75) | 29.56 (12.96) | 0.008    | bvFTD<SCD, p=0.05, bvAD<tAD, p=0.007, bvFTD<tAD, p=0.006                     | bvAD<SCD, p=0.05, bvFTD<SCD, p=0.05, bvAD<tAD, p=0.004, bvFTD<tAD, p=0.004 |
| Sad              | 15.29 (8.44)  | 30.27 (12.08) | 17.78 (15.52) | 27.17 (13.46) | 0.01     | bvAD<SCD, p=0.03, bvAD<tAD, p=0.003, bvFTD<tAD, p=0.01                       | bvAD<SCD, p=0.02, bvFTD<SCD, p=0.03, bvAD<tAD, p=0.001, bvFTD<tAD, p=0.007 |

|          |               |               |                  |               |       |                                                                                     |                                                              |
|----------|---------------|---------------|------------------|---------------|-------|-------------------------------------------------------------------------------------|--------------------------------------------------------------|
| Surprise | 18.49 (10.46) | 31.81 (12.58) | 19.33<br>(13.56) | 27.89 (12.17) | 0.02  | bvAD<tAD, p=0.007,<br>bvFTD<tAD, p=0.01                                             | bvAD<tAD, p=0.006,<br>bvFTD<tAD, p=0.01                      |
| Total    | 18.74 (9.53)  | 32.72 (12.08) | 19.37<br>(14.28) | 30.60 (11.69) | 0.005 | bvAD<SCD, p=0.02,<br>bvFTD<SCD, p=0.03,<br>bvAD<tAD, p=0.004,<br>bvFTD<tAD, p=0.006 | bvAD<SCD, p=0.02,<br>bvFTD<SCD, p=0.03,<br>bvAD<tAD, p=0.002 |

---

\*based on ANOVA test

\*\*based on post hoc group comparisons

\*\*\* based on post hoc group comparisons adjusted for age and sex

## Empathy – Interpersonal Reactivity Index

**Supplementary Table 18.** Scores on the Interpersonal Reactivity Index, a questionnaire measuring empathy, across diagnostic groups

|                    | bvAD            | tAD          | bvFTD        | SCD             | p- value* | Group differences, unadjusted**                                | Group differences, age and sex adjusted*** |
|--------------------|-----------------|--------------|--------------|-----------------|-----------|----------------------------------------------------------------|--------------------------------------------|
| n                  | 9               | 10           | 11           | 10              |           |                                                                |                                            |
| Perspective Taking | 11.33<br>(4.58) | 13.00 (3.19) | 8.73 (5.61)  | 15.90<br>(2.60) | 0.0003    | bvAD<SCD, p=0.02,<br>bvFTD<SCD, p=0.0001,<br>bvFTD<tAD, p=0.02 | bvFTD<SCD, p=0.001,<br>bvFTD<tAD, p=0.05   |
| Empathetic Concern | 12.89<br>(4.28) | 12.40 (4.19) | 12.00 (3.00) | 14.00<br>(0.94) | 0.24      | ns                                                             | ns                                         |
| Fantasy            | 10.33<br>(5.22) | 13.00 (3.09) | 8.64 (3.96)  | 13.60<br>(1.65) | 0.001     | bvAD<SCD, p=0.05,<br>bvFTD<SCD, p=0.002,<br>bvFTD<tAD, p=0.007 | bvFTD<SCD, p=0.03,<br>bvFTD<tAD, p=0.03    |
| Personal Distress  | 13.11<br>(3.52) | 14.50 (2.95) | 14.45 (3.01) | 14.80<br>(1.87) | 0.60      | ns                                                             | ns                                         |

\*based on ANOVA test adjusted for age and sex

\*\*based on post hoc group comparisons

\*\*\* based on post hoc group comparisons adjusted for age and sex

## Empathy – empathy eliciting videos

**Supplementary Table 19.** Results of empathy videos across diagnostic groups: empathetic concern and personal distress scores and galvanic skin response while watching empathy eliciting videos

|                           | bvAD        | tAD         | bvFTD       | SCD         | p- value* | Group differences, unadjusted** | Group differences, age and sex adjusted*** |
|---------------------------|-------------|-------------|-------------|-------------|-----------|---------------------------------|--------------------------------------------|
| n                         | 11          | 11          | 11          | 9           |           |                                 |                                            |
| Empathetic concern        | 2.55 (1.08) | 2.61 (1.21) | 2.11 (1.20) | 2.81 (0.65) | 0.14      | ns                              | ns                                         |
| Personal distress         | 1.61 (0.66) | 1.64 (0.66) | 1.87 (1.20) | 1.67 (0.60) | 0.63      | ns                              | ns                                         |
| n                         | 11          | 11          | 10          | 9           |           |                                 |                                            |
| GSR PPM uplifting video   | 1.56 (1.99) | 1.56 (1.99) | 2.31 (2.66) | 1.49 (1.44) | 0.65      | ns                              | ns                                         |
| GSR PPM distressing video | 1.97 (2.41) | 1.97 (2.41) | 2.06 (3.10) | 1.20 (1.76) | 0.26      | ns                              | ns                                         |

\*based on ANOVA test

\*\*based on post hoc group comparisons

\*\*\* based on post hoc group comparisons adjusted for age and sex

**Supplementary Table 20.** Mean GSR per baseline condition and empathy video condition across groups.

|                                               | bvAD (N=10)    | tAD (N=11)    | bvFTD (N=11)  | SCD (N=10)    | p-value* | Group differences adjusted** | Group differences, age and sex adjusted*** |
|-----------------------------------------------|----------------|---------------|---------------|---------------|----------|------------------------------|--------------------------------------------|
| GSR Nature videos, mean (SD)                  | 1.48 (1.45)    | 1.58 (1.26)   | 0.762 (0.547) | 2.16 (1.89)   | 0.05     | ns                           | bvFTD<SCD, p=0.03, tAD>bvFTD, p=0.05       |
| GSR Empathy videos, Mean (SD)                 | 1.51 (0.998)   | 1.49 (1.26)   | 0.995 (0.736) | 1.35 (1.50)   | 0.42     | ns                           | ns                                         |
| $\Delta$ GSR Empathy-Nature videos, Mean (SD) | 0.0305 (0.721) | 0.142 (0.320) | 0.178 (0.311) | -0.817 (1.34) | 0.15     | ns                           | ns                                         |
| P-value difference Empathy vs Nature videos   | 0.55           | 0.90          | 0.91          | 0.96          | -        | -                            | -                                          |

\*based on ANOVA test

\*\*based on post hoc group comparisons

\*\*\* based on post hoc group comparisons adjusted for age and sex

## Knowledge of Social Norms

**Supplementary Table 21.** Scores on Social Norms Questionnaire across diagnostic groups

|                         | bvAD         | tAD          | bvFTD        | SCD          | p- value* | Group differences, unadjusted**                                              | Group differences, sex and age adjusted***                                  |
|-------------------------|--------------|--------------|--------------|--------------|-----------|------------------------------------------------------------------------------|-----------------------------------------------------------------------------|
| n                       | 11           | 11           | 11           | 10           |           |                                                                              |                                                                             |
| SNQ total score         | 16.00 (1.61) | 17.82 (2.14) | 15.18 (2.23) | 18.44 (1.59) | 0.0003    | bvAD<SCD, p=0.005, bvFTD<SCD, p=0.0002, bvAD<tAD, p=0.03, bvFTD<tAD, p=0.001 | bvAD<SCD, p=0.02, bvFTD<SCD, p=0.0006, bvAD<tAD, p=0.05, bvFTD<tAD, p=0.003 |
| SNQ break score         | 2.09 (1.51)  | 1.09 (0.54)  | 1.73 (1.42)  | 1.11 (0.60)  | 0.06      | ns                                                                           | ns                                                                          |
| SNQ overadherence score | 3.91 (1.58)  | 3.09 (2.12)  | 5.09 (2.30)  | 2.44 (1.24)  | 0.005     | bvFTD<SCD, p=0.002, bvFTD<tAD, p=0.01                                        | bvFTD<SCD, p=0.006, bvFTD<tAD, p=0.02                                       |

\*based on ANOVA test adjusted for age and sex

\*\*based on post hoc group comparisons

\*\*\* based on post hoc group comparisons adjusted for age and sex

## Moral reasoning

**Supplementary Table 22.** Scores on and galvanic skin response to moral dilemmas, across diagnostic groups

|                                                   | bvAD        | tAD         | bvFTD       | SCD         | p- value* | Group differences, unadjusted | Group differences, age and sex adjusted** |
|---------------------------------------------------|-------------|-------------|-------------|-------------|-----------|-------------------------------|-------------------------------------------|
| n                                                 | 10          | 11          | 11          | 9           |           |                               |                                           |
| Personal dilemma, percentage rational responses   | 50.00       | 36.36       | 18.18       | 46.88       | 0.45      | ns                            | ns                                        |
| Impersonal dilemma, percentage rational responses | 90.00       | 90.91       | 81.82       | 96.88       | 0.91      | ns                            | ns                                        |
| n                                                 | 10          | 11          | 9           | 8           |           |                               |                                           |
| Impersonal dilemma, GSR PPM                       | 3.17 (2.34) | 3.16 (3.65) | 1.48 (1.71) | 3.33 (3.46) | 0.55      | ns                            | ns                                        |
| Personal dilemma, GSR PPM                         | 2.89 (2.29) | 3.43 (4.07) | 0.86 (1.08) | 2.18 (2.07) | 0.06      | ns                            | bvFTD<SCD, p=0.03                         |

\*based on ANOVA test

\*\*based on post hoc group comparisons

\*\*\* based on post hoc group comparisons adjusted for age and sex



**Supplementary Fig. 1.** Inclusion flow of participants into the current study

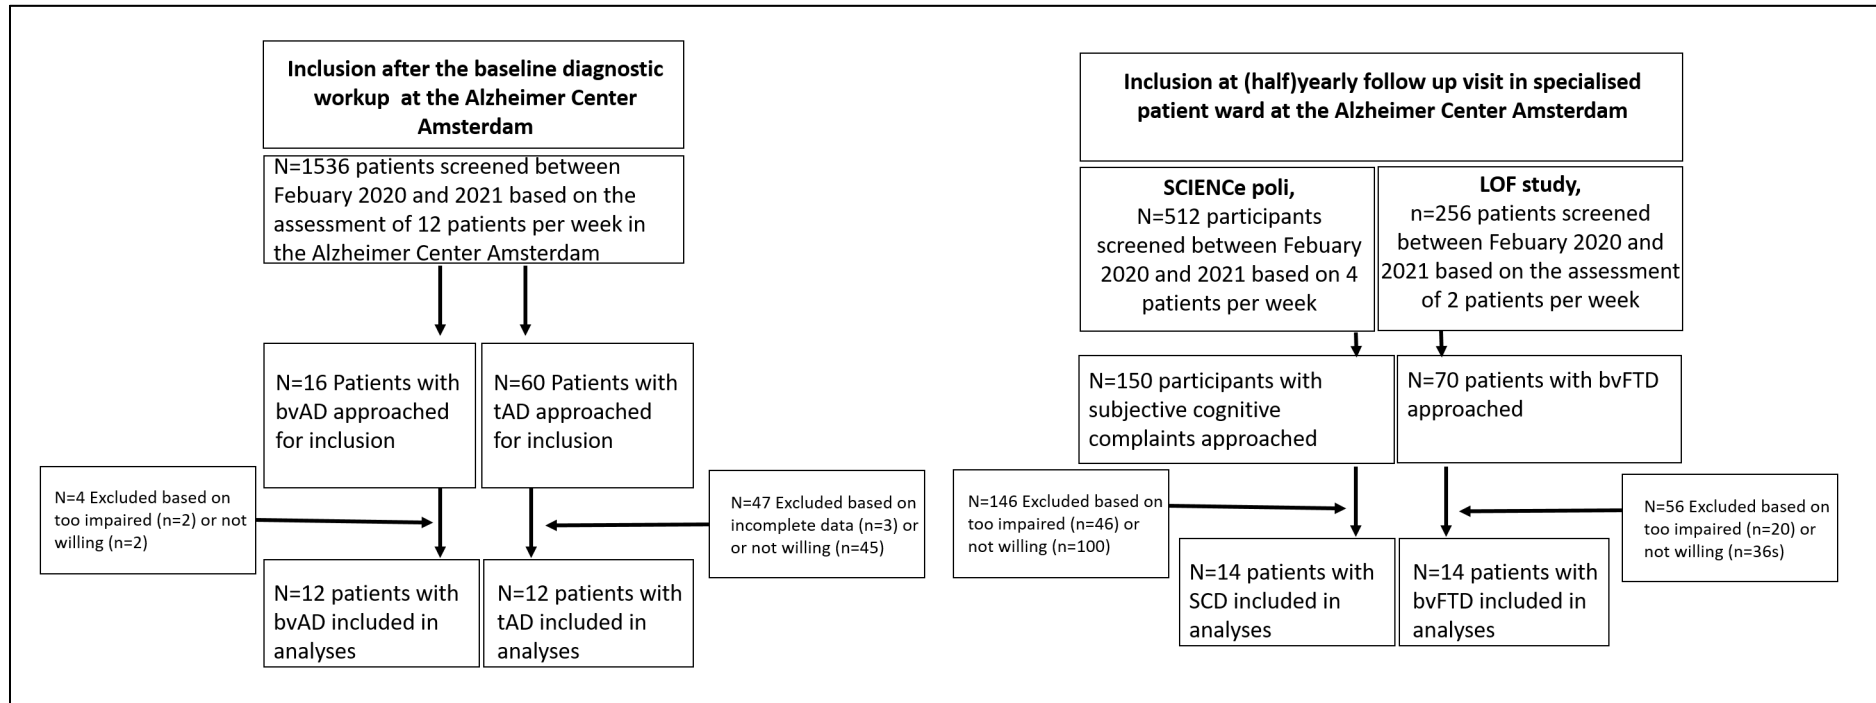

Supplementary Fig. 2. Matrices of missing values on the Ekman and SNQ prior to imputing procedures.

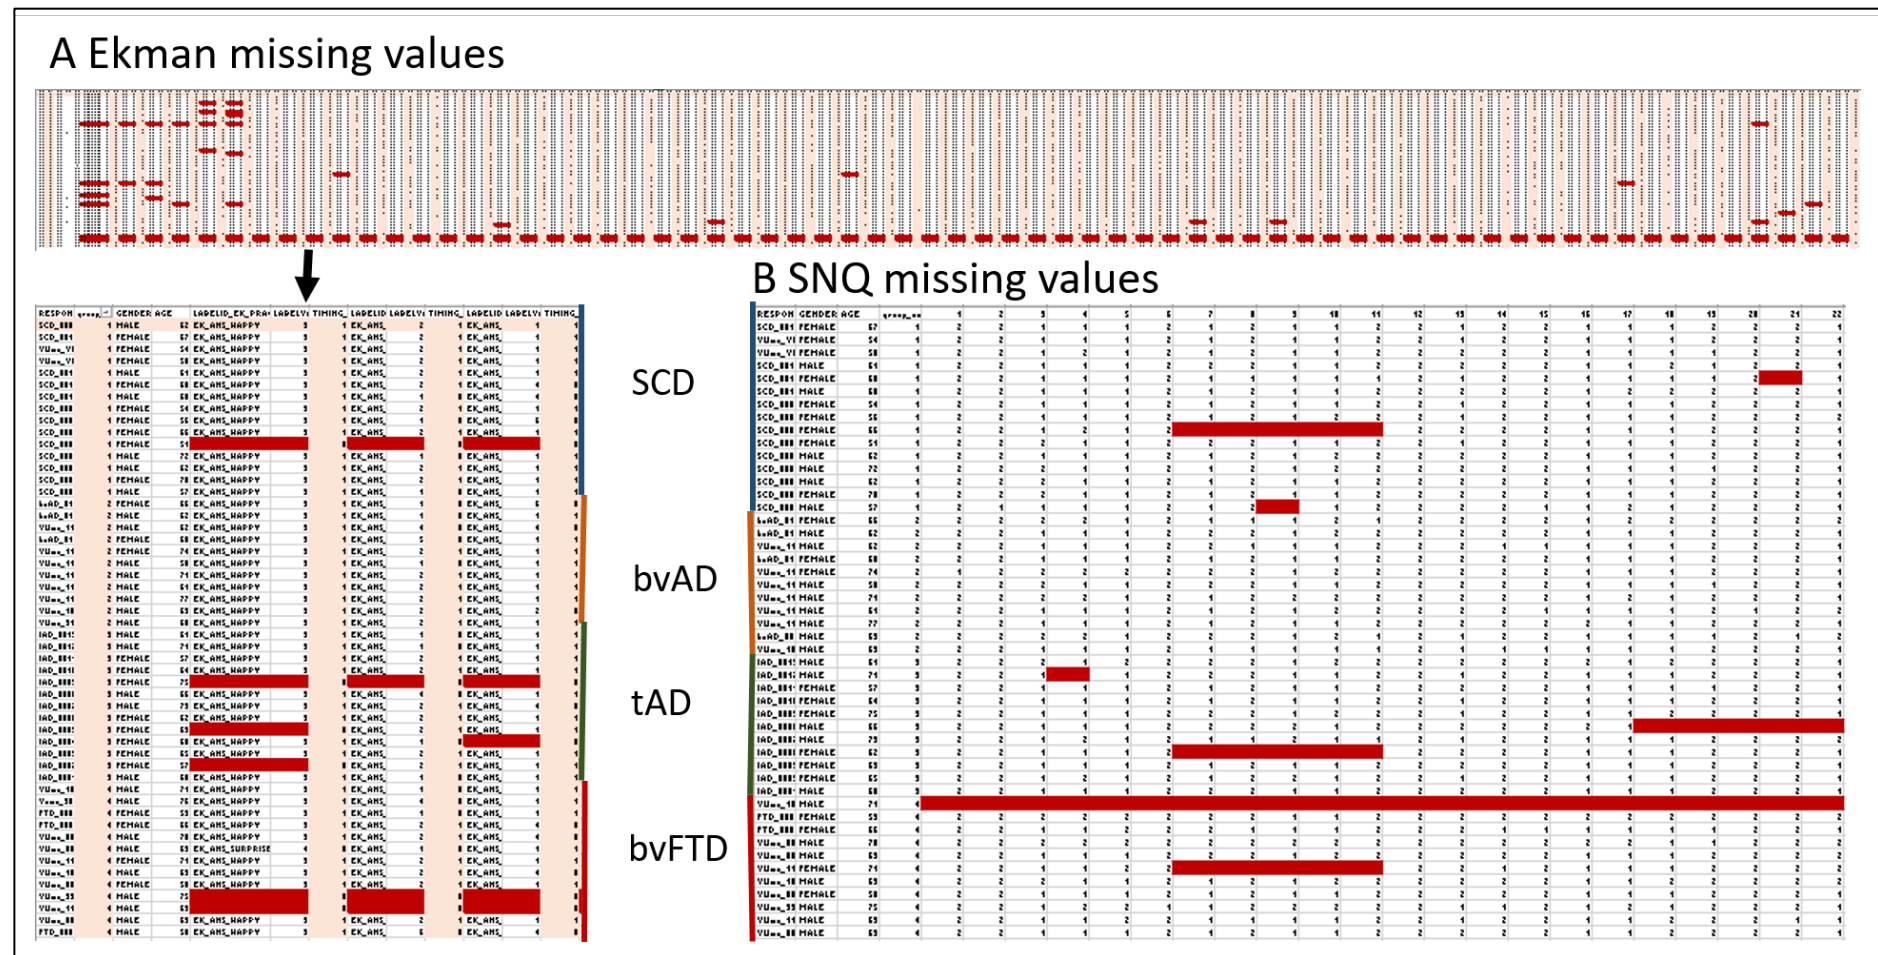

(A) shows the distribution of missing values across individuals and across items of the Ekman test. Each row indicates an individual and each column indicates a) the response label (i.e. EK\_ANS\_HAPPY), b) the corresponding answer response code (i.e. 3), c) the score ascribed to this answer (i.e. 0 or 1). The full dataset is shown on the top and the first 6 columns are depicted below the arrow for visualization purposes. (B) shows the distribution of missing values across individuals and across items of the Social Norms Questionnaire. The cases are ordered per diagnostic group (SCD-bvAD-tAD-bvFTD) and missing values are indicated with red colors.

**Supplementary Fig. 3.** Example of Area of Interest imposed on the Ekman faces to retrieve eye tracking dwell time

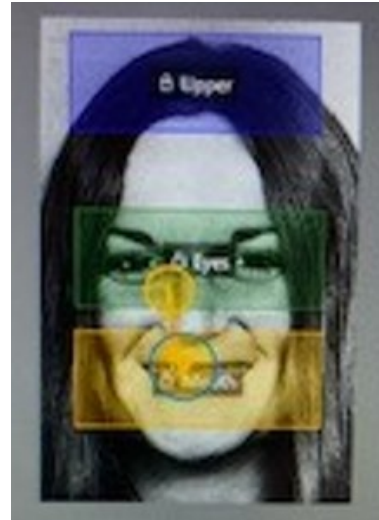

**Supplementary Fig. 4.** Cognition domain z-scores across groups

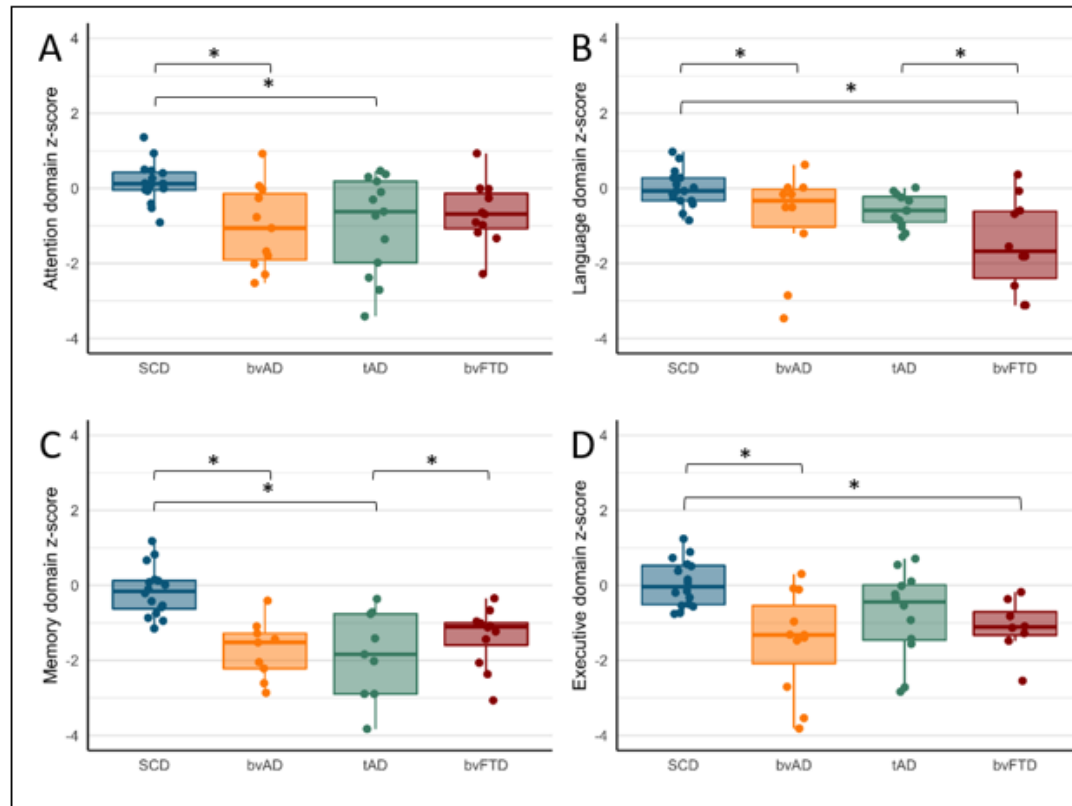

Domain z-scores presented in this figure are normalized to a reference group of 583 cognitively normal individuals with negative amyloid-beta biomarker status<sup>1</sup>. **(A)** Attention domain z-scores, based on the Digit Span forward, Trail Making Test A and Stroop 1 and 2 cards, **(B)** Memory domain z-scores, based on the Rey-Oxford Verbal Auditory Memory Test immediate and delayed recall conditions and the Visual Association Test, **(C)** Language domain z-scores, based on the Visual Association Test naming condition and Animal Fluency, **(D)** Executive domain z-scores, based on the Digit Span backward, Trail Making Test B, Stroop card 3 and Letter Fluency<sup>2</sup>.

**Supplementary Fig. 5.** Mean GSR in a nature video condition compared to an empathy eliciting video condition across groups

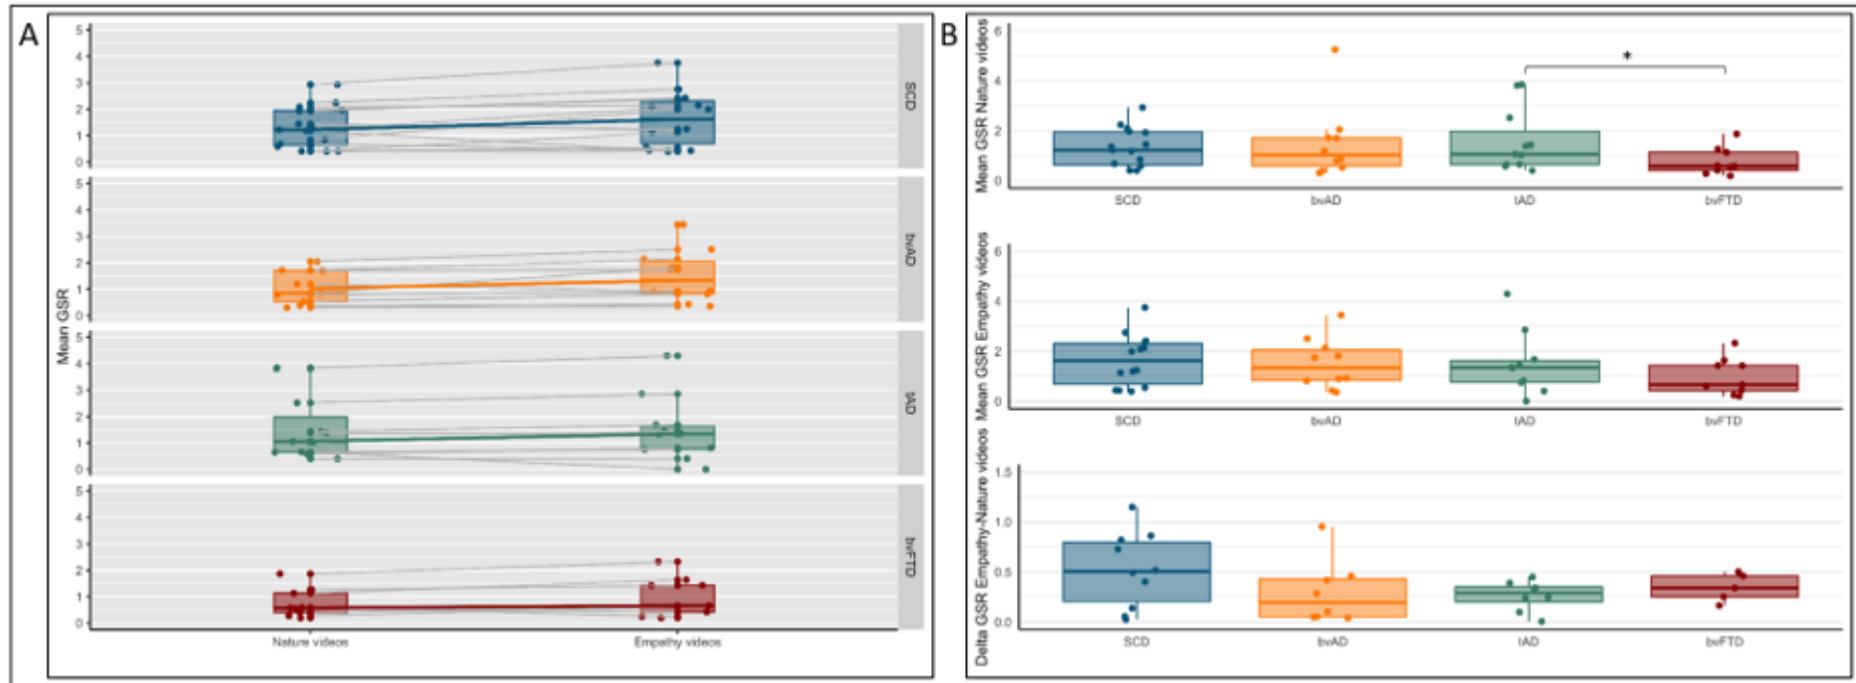

(A) shows the mean GSR within the nature video versus the empathy eliciting video across different groups, showing no significant differences between the two conditions in any of the diagnostic groups. (B) shows the mean GSR within the nature video, empathy eliciting video and the difference between the empathy and nature video conditions across groups, showing only significantly higher GSR in the typical AD group versus the bvFTD group in the nature video condition.

## References

1. Groot C, van Loenhoud AC, Barkhof F, et al. Differential effects of cognitive reserve and brain reserve on cognition in Alzheimer disease. *Neurology*. Jan 9 2018;90(2):e149-e156. doi:10.1212/wnl.0000000000004802
2. van der Flier WM, Scheltens P. Amsterdam Dementia Cohort: Performing Research to Optimize Care. *Journal of Alzheimer's Disease*. 2018;62:1091-1111. doi:10.3233/JAD-170850
